# Supplementary material for: Changes in functional neuroimaging measures as novices gain proficiency on the fundamentals of laparoscopic surgery suturing task
Source: PubMed Central journal article supplement (PMC10160767; doi:10.1117/1.nph.10.2.023521), 2023-05-05
Supplement: NPh_010_023521_SD001.pdf [file NPh_010_023521_SD001.pdf]

## Supplementary Materials

**Table S1.** p values for the comparison of cortical activation for Day 1 and Day 15. \* indicates a significant difference either from baseline or for the day-to-day contrast.

| Source | Detector | HbO Day 1 | HbR Day 1 | HbO Day 15 | HbR Day 15 | HbO Day 1 vs. Day 15 | HbR Day 1 vs. Day 15 |
|--------|----------|-----------|-----------|------------|------------|----------------------|----------------------|
| 1      | 1        | 0.046*    | 0.127     | 0.001*     | 0.151      | 0.509                | 0.621                |
| 1      | 15       | 0.209     | 0.211     | 0.059      | 0.314      | 0.826                | 0.474                |
| 2      | 2        | 0.363     | 0.154     | 0.081      | 0.281      | 0.116                | 0.960                |
| 2      | 3        | 0.633     | 0.102     | 0.786      | 0.878      | 0.899                | 0.322                |
| 3      | 1        | 0.013*    | 0.452     | <0.001*    | 0.196      | 0.151                | 0.800                |
| 3      | 3        | 0.015*    | 0.062     | 0.367      | 0.855      | 0.442                | 0.253                |
| 3      | 5        | 0.018*    | 0.194     | 0.002*     | 0.147      | 0.844                | 0.548                |
| 4      | 1        | 0.047*    | 0.944     | 0.000*     | 0.878      | 0.080                | 0.971                |
| 4      | 3        | 0.072     | 0.338     | 0.589      | 0.131      | 0.557                | 0.644                |
| 4      | 15       | 0.748     | 0.256     | 0.360      | 0.575      | 0.726                | 0.273                |
| 5      | 2        | 0.945     | 0.613     | 0.348      | 0.636      | 0.331                | 0.875                |
| 5      | 3        | 0.988     | 0.865     | 0.973      | 0.042*     | 0.987                | 0.176                |
| 5      | 4        | 0.531     | 0.026*    | 0.938      | 0.981      | 0.572                | 0.111                |
| 5      | 5        | 0.903     | 0.990     | 0.211      | 0.674      | 0.255                | 0.781                |
| 6      | 4        | 0.002*    | 0.413     | 0.051      | 0.669      | 0.230                | 0.342                |
| 6      | 5        | 0.136     | 0.627     | 0.010*     | 0.888      | 0.954                | 0.793                |
| 6      | 6        | 0.550     | 0.108     | 0.403      | 0.978      | 0.986                | 0.162                |
| 7      | 2        | 0.305     | 0.518     | 0.649      | 0.638      | 0.647                | 0.289                |
| 7      | 4        | 0.399     | 0.109     | 0.066      | 0.681      | 0.438                | 0.191                |
| 7      | 7        | 0.673     | 0.060     | 0.801      | 0.480      | 0.506                | 0.066                |
| 8      | 4        | 0.745     | 0.390     | 0.070      | 0.245      | 0.308                | 0.908                |
| 8      | 6        | 0.254     | 0.001*    | 0.759      | 0.314      | 0.544                | 0.039*               |
| 8      | 7        | 0.546     | 0.191     | 0.138      | 0.334      | 0.426                | 0.109                |
| 9      | 8        | 0.066     | 0.825     | 0.000*     | 0.501      | 0.125                | 0.532                |
| 9      | 15       | 0.191     | 0.084     | 0.027*     | 0.518      | 0.970                | 0.238                |
| 10     | 8        | 0.057     | 0.222     | 0.003*     | 0.050*     | 0.209                | 0.989                |
| 10     | 9        | 0.339     | 0.358     | 0.015*     | 0.590      | 0.130                | 0.701                |
| 10     | 13       | 0.028*    | 0.389     | 0.019*     | 0.192      | 0.624                | 0.153                |
| 11     | 9        | 0.414     | 0.315     | 0.347      | 0.357      | 0.832                | 0.994                |
| 11     | 10       | 0.649     | 0.305     | 0.991      | 0.117      | 0.750                | 0.582                |
| 12     | 8        | 0.223     | 0.188     | 0.001*     | 0.063      | 0.205                | 0.473                |
| 12     | 9        | 0.543     | 0.314     | 0.009*     | 0.312      | 0.166                | 0.983                |
| 12     | 15       | 0.142     | 0.411     | 0.221      | 0.539      | 0.845                | 0.808                |
| 13     | 9        | 0.638     | 0.024*    | 0.283      | 0.034*     | 0.782                | 0.646                |
| 13     | 10       | 0.364     | 0.877     | 0.905      | 0.119      | 0.476                | 0.231                |
| 13     | 12       | 0.154     | 0.038*    | 0.026*     | 0.462      | 0.010*               | 0.277                |
| 13     | 13       | 0.508     | 0.585     | 0.092      | 0.849      | 0.536                | 0.665                |
| 14     | 12       | 0.663     | 0.236     | 0.187      | 0.035      | 0.680                | 0.883                |
| 14     | 13       | 0.013*    | 0.113     | 0.150      | 0.006*     | 0.418                | 0.642                |
| 14     | 14       | 0.810     | 0.073     | 0.029*     | 0.182      | 0.069                | 0.721                |
| 15     | 10       | 0.405     | 0.230     | 0.864      | 0.687      | 0.433                | 0.164                |
| 15     | 11       | 0.419     | 0.223     | 0.084      | 0.795      | 0.049*               | 0.489                |
| 15     | 12       | 0.134     | 0.022*    | 0.181      | 0.049*     | 0.714                | 0.396                |
| 16     | 11       | 0.290     | 0.939     | 0.446      | 0.625      | 0.129                | 0.616                |
| 16     | 12       | 0.325     | 0.020*    | 0.565      | 0.099      | 0.703                | 0.248                |
| 16     | 14       | 0.711     | 0.003*    | 0.753      | 0.001*     | 0.619                | 0.150                |

**Table S2.** p values for the comparison of cortical activation on Day 15 for high performing versus low performing group. \* indicates a significant difference for the group contrast.

| Source | Detector | HbO Day 15 | HbR Day 15 |
|--------|----------|------------|------------|
| 1      | 1        | 0.936      | 0.174      |
| 1      | 15       | 0.430      | 0.220      |
| 2      | 2        | 0.072      | 0.512      |
| 2      | 3        | 0.032*     | 0.131      |
| 3      | 1        | 0.875      | 0.582      |
| 3      | 3        | 0.005*     | 0.386      |
| 3      | 5        | 0.886      | 0.152      |
| 4      | 1        | 0.836      | 0.215      |
| 4      | 3        | 0.004*     | 0.080      |
| 4      | 15       | 0.307      | 0.498      |
| 5      | 2        | 0.195      | 0.505      |
| 5      | 3        | 0.205      | 0.839      |
| 5      | 4        | 0.694      | 0.803      |
| 5      | 5        | 0.006*     | 0.583      |
| 6      | 4        | 0.565      | 0.112      |
| 6      | 5        | 0.293      | 0.132      |
| 6      | 6        | 0.791      | 0.394      |
| 7      | 2        | 0.309      | 0.840      |
| 7      | 4        | 0.511      | 0.632      |
| 7      | 7        | 0.916      | 0.880      |
| 8      | 4        | 0.011*     | 0.963      |
| 8      | 6        | 0.642      | 0.682      |
| 8      | 7        | 0.712      | 0.443      |
| 9      | 8        | 0.209      | 0.685      |
| 9      | 15       | 0.260      | 0.128      |
| 10     | 8        | 0.102      | 0.329      |
| 10     | 9        | 0.067      | 0.252      |
| 10     | 13       | 0.245      | 0.617      |
| 11     | 9        | 0.896      | 0.416      |
| 11     | 10       | 0.446      | 0.412      |
| 12     | 8        | 0.339      | 0.727      |
| 12     | 9        | 0.887      | 0.821      |
| 12     | 15       | 0.121      | 0.320      |
| 13     | 9        | 0.084      | 0.769      |
| 13     | 10       | 0.371      | 0.194      |
| 13     | 12       | 0.047*     | 0.195      |
| 13     | 13       | 0.018*     | 0.940      |
| 14     | 12       | 0.268      | 0.646      |
| 14     | 13       | 0.086      | 0.994      |
| 14     | 14       | 0.630      | 0.843      |
| 15     | 10       | 0.966      | 0.261      |
| 15     | 11       | 0.050*     | 0.907      |
| 15     | 12       | 0.138      | 0.230      |
| 16     | 11       | 0.034*     | 0.503      |
| 16     | 12       | 0.217      | 0.820      |
| 16     | 14       | 0.261      | 0.257      |
